# Supplementary material for: Tropical tropospheric aerosol sources and chemical composition observed at high-altitude in the Bolivian Andes
Source: Copernicus journal article supplement (doi:10.5194/egusphere-2023-1298), 2023-07-20
Supplement: Supplementary file 2 [file egusphere-2023-1298-supplement-version2.zip]

Archive with 2 entries (2 files):
- Moreno-supplementary-material_revised_20231218.pdf
- Tables_Chacaltaya-ambient-season-wilcoxon_test_2023.xlsx
