# Supplementary material for: Tropical tropospheric aerosol sources and chemical composition observed at high-altitude in the Bolivian Andes
Source: Copernicus journal article supplement (doi:10.5194/egusphere-2023-1298), 2023-07-20
Supplement: Supplementary file 2 [file egusphere-2023-1298-supplement-version2.zip › Tables_Chacaltaya-ambient-season-wilcoxon_test_2023.xlsx]

## Sheet: ambient conditions
Ambient			PM10-A				PM2.5				PM10-B				PM10-C
(534 hPa)		December 2011 to July 2013				August 2013 to December 2015				April 2016 to August 2017				February 2019 to March 2020
ng/m3	Season	mean	median	std	N>QL	mean	median	std	N>QL	mean	median	std	N>QL	mean	median	std	N>QL
OC	annual	482.765	371.353	342.537	56	465.664	353.771	385.258	77	423.401	320	319.522	49	320.9	279.822	237.226	32
	DJFM	253.27	207.946	155.331	15	259.314	213.934	194.234	10	196.081	184.655	126.886	13	164.362	153.194	86.8208	11
	A	328.294	312.467	60.1116	5	303.774	268.264	188.966	6	171.85	173.275	47.0843	5	270.611	254.723	108.213	4
	MJJA	529.961	448.515	287.074	22	551.851	430.282	510.061	33	483.204	420.249	317.859	21	447.217	374.738	281.832	15
	SON	709.655	585.53	455	14	472.474	437.119	243.996	28	719.108	663.722	286.76	10	335.06	335.06	51.4393	2
EC	annual	49.3876	36.31	48.314	36	42.9317	37.0873	25.8543	74	41.3564	30.0842	36.548	49	34.9996	27.3043	25.8406	32
	DJFM	22.2798	17.3312	12.4748	12	27.4569	29.0759	16.4718	8	19.5027	17.807	10.6168	13	20.11	19.2322	11.9907	11
	A	39.062	39.062	6.33701	2	39.1308	36.9319	30.5607	6	20.5014	18.5148	5.4241	5	35.294	32.7165	19.2553	4
	MJJA	37.5707	23.856	31.8913	8	47.9414	43.5018	24.6909	32	46.1882	35.7548	31.8774	21	46.1013	37.3437	31.455	15
	SON	80.8504	60.6998	61.2812	14	42.4422	33.7808	27.5657	28	70.0466	51.7292	52.9337	10	33.0414	33.0414	1.60521	2
Li+	annual	0.0283113	0.0200473	0.0375094	48	0.0170511	0.0135751	0.0176855	52	0.0064611	0.00240879	0.0121067	19	0.00816159	0.00712198	0.00617609	27
	DJFM	0.0107569	0.00545951	0.0117239	10	0.0138491	0.0138491	0.00261685	2	0.00336346	0.00197505	0.00384623	4	0.00765289	0.0071441	0.00358985	9
	A	0.0141638	0.0141638	0.00903386	2	0.0100779	0.0100779	0.00107776	2	0.00207559	0.00180352	0.00127683	4	0.00786712	0.00620077	0.00583826	4
	MJJA	0.0224466	0.0211528	0.0116128	22	0.012457	0.00919045	0.00836975	26	0.00295435	0.00217529	0.00327881	8	0.00960425	0.00681528	0.00793085	12
	SON	0.052087	0.0354511	0.061908	14	0.0234056	0.0200408	0.0245313	22	0.02579	0.0146652	0.0242824	3	0.00238376	0.00238376	0.000308527	2
Na+	annual	13.4803	11.707	11.1217	54	13.4766	10.7601	8.21627	71	15.9909	12.1254	14.3235	41	6.43573	4.9015	5.49304	31
	DJFM	8.44396	9.46683	5.24019	15	8.81372	7.15306	5.70672	7	11.3645	12.4651	6.93717	6	4.37095	4.78135	3.33097	11
	A	12.1387	13.9902	6.52872	4	9.81376	8.94042	5.09646	4	6.31854	5.84682	2.96318	5	6.27587	6.83833	3.48939	4
	MJJA	11.1982	8.64341	8.68425	21	14.0769	13.3234	8.2474	33	12.6615	11.4213	6.43114	20	8.59071	5.87825	6.91285	14
	SON	22.683	21.9916	14.8126	14	14.4945	11.4123	8.83573	27	30.2617	25.354	21.8339	10	3.02695	3.02695	1.10962	2
NH4+	annual	83.965	76.9293	56.332	58	162.194	156.878	101.767	78	168.082	162.637	104.176	49	149.14	131.788	85.2691	32
	DJFM	47.3534	42.9113	40.964	16	74.0093	30.1477	98.2707	10	92.571	57.987	77.754	13	107.259	121.76	62.9323	11
	A	83.4153	59.477	43.8742	5	185.579	186.644	131.267	6	127.931	133.483	53.6668	5	215.484	191.547	123.911	4
	MJJA	70.9823	67.5255	34.8227	23	187.745	167.098	103.178	34	169.471	206.177	83.6517	21	168.821	159.166	81.052	15
	SON	147.332	151.716	55.3242	14	157.652	153.157	79.1737	28	283.402	293.436	95.2734	10	99.1839	99.1839	7.49283	2
K+	annual	12.9831	9.4854	12.2287	54	14.1684	12.4659	9.54493	77	18.2825	8.29345	18.2408	47	13.7685	10.6735	14.0851	31
	DJFM	4.61381	4.63864	2.57939	13	4.35887	3.42129	3.05497	9	4.40622	4.23662	3.68865	11	4.30989	3.27058	3.46266	10
	A	5.68298	4.5842	3.73497	5	6.32046	5.83877	4.84249	6	3.38472	2.67214	2.33241	5	9.60361	8.5123	5.09565	4
	MJJA	12.738	10.9506	9.03448	22	17.9076	16.0725	10.4119	34	24.1193	22.046	21.2274	21	21.3735	15.0987	16.7482	15
	SON	23.7471	18.6028	15.8732	14	14.4625	12.6862	7.30627	28	28.7381	29.5528	11.0507	10	12.3532	12.3532	1.80901	2
Mg2+	annual	3.85298	3.61281	2.38613	56	4.56012	4.16499	2.91282	75	3.62983	2.66425	3.52207	49	3.52406	3.04906	2.58919	32
	DJFM	2.4912	1.86396	1.82727	15	1.98348	2.39009	1.62813	9	1.67213	0.783112	1.59097	13	2.37539	2.75238	1.25732	11
	A	2.97454	1.71686	2.71556	5	2.64972	1.74949	2.21338	6	2.62585	2.22289	2.15881	5	3.23576	2.9135	1.83388	4
	MJJA	3.4819	3.12403	1.30478	22	5.59545	4.49857	3.23614	33	3.1786	2.60514	1.78364	21	4.69798	3.57124	3.15173	15
	SON	6.20888	6.61997	2.61281	14	4.57814	4.56048	2.23606	27	7.62442	5.01443	5.41693	10	1.61392	1.61392	0.201431	2
Ca2+	annual	38.8785	35.6843	23.0979	55	48.8046	40.02	42.1182	79	30.867	27.575	23.0792	48	27.6363	19.4363	22.5664	32
	DJFM	20.9765	16.6939	16.1579	14	15.2889	11.0529	12.0702	11	12.814	7.04369	11.3962	12	12.1897	9.2991	8.60391	11
	A	22.0633	18.8678	15.2666	5	36.0961	31.1563	27.4034	6	16.682	20.0792	11.744	5	21.4927	22.2711	9.73648	4
	MJJA	45.4444	43.0834	17.6742	22	68.8724	59.5929	52.2674	34	34.0457	31.5803	16.3826	21	42.1557	41.9583	24.6587	15
	SON	52.4682	50.4495	25.554	14	40.3266	39.2177	22.7495	28	52.9477	44.078	29.215	10	15.9843	15.9843	6.31738	2
F-	annual	1.08117	0.784734	1.22018	49	1.47831	0.944859	1.31403	76	0.785231	0.59523	0.619341	42				14
	DJFM	0.48807	0.461268	0.217629	10	0.481516	0.318428	0.295485	9	0.301475	0.248246	0.219165	10		Fluoride		5
	A	0.491917	0.422658	0.249137	5	0.995762	0.624497	1.18236	6	0.288397	0.23574	0.0977388	3		lost for		0
	MJJA	0.835901	0.677816	0.562463	20	1.92375	1.51977	1.49079	33	1.01231	0.907287	0.609362	20		PM10C		9
	SON	2.06564	1.4696	1.85541	14	1.37712	0.93555	1.11419	28	0.983722	0.898523	0.684995	9				0
Cl-	annual	4.58229	3.23865	3.72023	47	6.9762	5.14008	5.78548	45	5.6975	4.05802	6.2548	34				25
	DJFM	2.08785	1.69269	1.3679	11	2.3831	2.3831	-	1	0.82625	0.82625	0.669653	2		Chloride		7
	A	2.92894	2.85244	0.929235	4	9.19691	9.19691	-	1	1.00275	1.32275	0.563067	3		lost for		3
	MJJA	4.76979	3.58471	4.09728	22	7.72183	5.62284	6.61621	28	5.63741	4.73197	4.36841	21		PM10C		14
	SON	7.57501	8.75184	3.21601	10	5.74251	4.21178	4.02164	15	8.83358	4.57544	10.1134	8				1
Br-	annual	0.771671	0.679234	0.492889	50	0.627109	0.485633	0.423537	69	0.867355	0.578964	0.81912	38	0.509936	0.414013	0.428206	28
	DJFM	0.45937	0.27583	0.583605	9	0.928025	0.832	0.828515	4	0.245122	0.221904	0.0857594	5	0.323725	0.129419	0.328332	9
	A	0.36433	0.416188	0.185413	5	0.246877	0.20894	0.126681	5	0.278844	0.250411	0.240843	4	0.327679	0.339431	0.143398	4
	MJJA	0.698367	0.671019	0.28614	22	0.611444	0.436178	0.385523	32	0.886101	0.923243	0.660809	20	0.690981	0.445146	0.488796	14
	SON	1.2331	1.11517	0.439917	14	0.669921	0.587819	0.400131	28	1.43294	1.44863	1.12461	9	0.38023	0.38023	-	1
NO3-	annual	78.81	67.6036	60.3758	58	44.871	34.6602	41.8725	76	58.0792	37.56	61.1938	45				29
	DJFM	26.1422	16.6747	26.2249	17	20.346	15.0555	16.9997	9	15.6242	7.49272	17.7595	11		Nitrate		8
	A	66.6351	79.825	27.2298	5	44.7625	22.6224	69.1847	6	15.5509	9.65318	14.2018	4		lost for		4
	MJJA	100.858	99.6879	44.7373	22	45.9384	35.437	32.7736	33	85.2316	59.817	72.3638	21		PM10C		15
	SON	112.465	121.628	77.126	14	51.5192	41.8047	48.7599	28	65.5142	48.4283	40.6741	9				2
SO42-	annual	241.146	213.608	174.791	58	599.96	559.961	425.304	79	530.327	492.192	407.244	52	483.999	475.856	267.077	32
	DJFM	161.658	129.574	146.865	16	274.277	149.612	369.633	10	273.293	179.032	243.307	14	352.661	352.812	189.875	11
	A	220.981	129.24	148.316	5	573.151	550.174	457.31	6	467.58	494.696	268.84	5	634.713	582.406	322.147	4
	MJJA	179.073	162.286	89.3118	23	727.724	720.513	477.199	35	485.072	497.946	325.901	23	567.466	483.153	276.46	15
	SON	441.167	425.446	175.975	14	562.315	493.602	299.084	28	1025.63	1067.34	423.992	10	278.919	278.919	11.592	2
Methanesulfonate	annual	3.48982	3.53646	1.88896	54	4.1677	3.95156	2.34011	76	3.56822	3.2984	1.83082	48	2.39821	2.56143	1.31659	32
	DJFM	1.79504	1.66787	1.30789	12	1.91433	1.53233	1.41295	8	1.99613	1.72395	1.43803	12	2.00459	1.02548	1.86988	11
	A	5.04069	4.58312	1.8529	5	2.98437	3.52975	1.52896	6	4.29365	3.28804	2.53717	5	2.65751	2.94676	0.963295	4
	MJJA	3.92087	3.60227	1.70387	23	4.56188	4.12767	2.02606	34	3.95817	3.65113	1.58343	21	2.76994	2.76001	0.812965	15
	SON	3.68044	4.4624	1.78494	14	4.58643	4.01782	2.65531	28	4.27313	4.11755	1.43165	10	1.25658	1.25658	0.286308	2
Fornate	annual	6.51512	4.66993	5.68181	48	7.33487	6.38977	3.71855	50	14.6599	5.21154	36.6524	16				27
	DJFM	4.40607	3.21711	3.5851	13	4.87229	4.87229	-	1	4.618	4.35618	2.42962	4		Formate		8
	A	2.7197	2.84873	0.771517	4	7.62664	7.62664	0.674386	2	1.42568	1.42568	0.312218	2		lost for		2
	MJJA	7.06132	6.62732	4.61777	18	7.43836	6.38977	3.58388	24	6.82021	5.21154	5.98115	8		PM10C		15
	SON	9.03571	7.02303	8.14128	13	7.30857	5.9069	4.12957	23	79.3369	79.3369	101.347	2				2
Oxalate	annual	17.4285	12.0054	21.6608	57	23.3565	21.38	16.1907	76	20.1727	16.0718	19.8591	45	28.2044	23.1521	16.8181	32
	DJFM	14.6436	13.8247	11.3712	17	14.4967	13.3615	9.67189	11	9.84125	4.67536	10.8106	11	20.7037	22.4039	9.82695	11
	A	11.9628	12.0054	11.0988	5	25.4771	21.2695	17.8212	6	4.93229	4.42401	4.96561	4	31.747	23.5791	20.1563	4
	MJJA	8.05177	1.93898	10.868	21	21.1849	21.2539	12.6822	31	19.3345	16.5566	15.492	21	31.7014	23.1676	19.836	15
	SON	36.8273	31.4278	32.7636	14	28.787	24.5634	19.6727	28	41.5293	40.4065	25.2172	9	36.1462	36.1462	9.82789	2
H (neq/m3)	annual	0.716059	0.357323	1.6004	59	3.21384	2.73028	3.23189	80	2.18603	1.41342	2.7461	52	1.07193	0.41815	1.34344	32
	DJFM	0.569938	0.0648566	1.22613	17	1.57328	1.55002	1.86981	11	0.638439	0.482741	0.562626	14	1.15141	1.26031	1.24855	11
	A	0.374816	0.511205	0.492225	5	1.7379	1.34468	2.44187	6	1.97057	1.00879	2.5852	5	0.817649	0.634682	0.772683	4
	MJJA	-0.132619	0.0159302	0.81178	23	3.94334	3.23068	3.66258	35	2.16287	1.50884	1.96809	23	1.19657	0.426388	1.61326	15
	SON	2.40962	1.77555	1.98782	14	3.26275	2.6212	2.99954	28	4.51366	3.25322	4.47931	10	0.208538	0.208538	0.284786	2
Glucose	annual	1.74749	1.40214	1.11363	54	1.96167	1.61469	1.40196	48	1.54664	1.30565	0.928354	44	0.963665	0.842768	0.596337	23
	DJFM	1.96772	1.76402	1.52078	13	1.50871	1.49222	0.715579	4	1.73186	1.19189	1.11004	10	1.05795	0.842959	0.816648	8
	A	1.25179	1.29402	0.327641	5	2.07033	2.07033	0.396123	2	0.764808	0.773033	0.212194	5	0.828024	0.805336	0.494721	3
	MJJA	1.33338	1.24561	0.479878	22	2.12466	1.64339	1.86999	21	1.29748	1.34195	0.582755	19	1.00643	1.0376	0.494099	10
	SON	2.37077	2.03043	1.29019	14	1.87462	1.42885	0.979461	21	2.22575	2.20593	1.07938	10	0.576167	0.576167	0.153591	2
Levoglucosan	annual	6.74301	2.82722	12.1029	56	7.63158	4.52554	10.0778	70	19.5395	14.1308	21.9405	32	5.87172	3.61544	5.67322	19
	DJFM	0.757698	0.587957	0.73572	15	1.49598	1.30239	1.5403	5	3.36748	3.1055	1.4057	4	1.4758	1.30599	1.04025	5
	A	1.39958	1.187	0.608627	5	1.07358	1.0103	0.716352	4	2.20194	2.20194	-	1	-	-	-	0
	MJJA	9.80205	5.12825	16.3607	22	10.641	4.85021	13.5577	33	25.9165	17.461	26.929	17	8.12203	7.94049	6.06085	12
	SON	10.2571	5.82501	10.2555	14	6.11725	5.37435	3.80787	28	16.9011	16.9551	11.5789	10	3.35961	3.35961	0.963235	2
Mannosan	annual	1.54692	0.524411	2.89993	17	1.09022	0.423833	1.94372	50	3.67155	2.15801	5.04065	25	0.730177	0.583496	0.699886	14
	DJFM	-	-	-	0	0.34265	0.34265	-	1	0.440155	0.409252	0.112565	3	0.0887623	0.0887623	0.0380969	2
	A	-	-	-	0	0.038636	0.038636	-	1	-	-	-	0	-	-	-	0
	MJJA	1.43616	0.427965	3.09092	14	1.49643	0.471441	2.24958	24	5.55748	4.06984	6.40171	13	0.870111	0.683696	0.72543	11
	SON	2.0638	1.38163	2.16574	3	0.758976	0.422059	1.6215	24	2.02455	2.12539	1.41462	9	0.473737	0.473737	-	1
Galactosan	annual	1.05589	0.405377	2.60879	23	0.73271	0.303832	1.19785	48	2.65899	1.24488	4.2938	26	0.579902	0.553022	0.499121	14
	DJFM	-	-	-	0	0.169799	0.169799	-	1	0.250776	0.250776	0.0612885	2	0.0469151	0.0469151	0.0263793	2
	A	0.0744506	0.0744506	0.0296674	2	-	-	-	0	0.345559	0.345559	-	1	-	-	-	0
	MJJA	1.83445	0.482238	3.67917	11	1.14369	0.514838	1.62845	23	4.37673	2.55001	5.59395	13	0.675792	0.560317	0.506801	11
	SON	0.395759	0.35035	0.39597	10	0.362306	0.274334	0.264018	24	1.13893	1.15961	0.881398	10	0.591082	0.591082	-	1
Arabitol	annual	2.02696	1.41491	2.32133	58	0.897685	0.778796	0.471612	44	0.561208	0.519919	0.174378	31	0.300262	0.273481	0.203359	22
	DJFM	1.46523	1.16378	0.9462	17	0.363308	0.408597	0.244944	3	0.766309	0.700533	0.285762	4	0.36473	0.277747	0.340134	6
	A	1.24771	1.01345	0.623696	5	0.788271	0.788271	0.114929	2	0.355674	0.355674	0.00976162	2	0.371119	0.371119	0.0522196	2
	MJJA	1.41387	0.888612	1.15963	22	0.965211	0.907194	0.482458	18	0.556817	0.519919	0.127029	17	0.271949	0.232491	0.138684	12
	SON	3.95079	2.96955	3.86845	14	0.926565	0.784211	0.474001	21	0.519372	0.516437	0.142372	8	0.205877	0.205877	0.115284	2
Mannitol	annual	0.724994	0.574981	0.578594	49	0.888688	0.719737	0.654751	43	0.973698	0.857052	0.550578	40	0.616127	0.486519	0.460864	13
	DJFM	0.747316	0.576576	0.714139	12	0.979434	1.22641	0.524798	3	1.35263	1.12103	0.785979	9	0.892538	0.947735	0.636134	5
	A	0.412231	0.422104	0.119697	5	1.34234	1.34234	0.530747	2	0.418889	0.381337	0.083287	3	0.459305	0.459305	0.0384862	2
	MJJA	0.580255	0.546597	0.243943	19	0.849827	0.750527	0.475369	20	0.841958	0.845773	0.353244	19	0.40639	0.264567	0.263183	5
	SON	1.03623	0.926675	0.773426	13	0.866336	0.606759	0.854187	18	1.05782	1.02737	0.501382	9	0.596403	0.596403	-	1

## Sheet: STP conditions
STP			PM10A				PM2,5				PM10B				PM10C
(1013 hPa, 0ºC)		December 2011 to July 2013				August 2013 to December 2015				April 2016 to August 2017				February 2019 to March 2020
ng/m3	Season	mean	median	std	N	mean	median	std	N	mean	median	std	N	mean	median	std	N
OC	annual	913.324	702.549	648.033	56	880.972	669.285	728.854	77	801.016	605.396	604.491	49	607.098	529.385	448.799	32
	DJFM	479.152	393.404	293.865	15	490.586	404.733	367.465	10	370.958	349.341	240.05	13	310.95	289.822	164.253	11
	A	621.087	591.144	113.723	5	574.698	507.519	357.497	6	325.115	327.813	89.0769	5	511.958	481.9	204.725	4
	MJJA	1002.61	848.528	543.103	22	1044.03	814.033	964.965	33	914.154	795.053	601.346	21	846.071	708.952	533.187	15
	SON	1342.57	1107.74	860.797	14	893.856	826.968	461.607	28	1360.45	1255.67	542.51	10	633.886	633.886	97.3161	2
EC	annual	92.7866	68.2171	90.7695	36	80.6577	69.6776	48.5736	74	77.698	56.5206	68.6643	49	65.7553	51.2978	48.5479	32
	DJFM	41.858	32.5608	23.4369	12	51.5845	54.6261	30.9463	8	36.6406	33.4547	19.9462	13	37.7815	36.1323	22.5274	11
	A	73.3875	73.3875	11.9056	2	73.5167	69.3855	57.4157	6	38.5169	34.7845	10.1905	5	66.3083	61.4659	36.1758	4
	MJJA	70.5857	44.8193	59.9155	8	90.0696	81.7288	46.3878	32	86.7758	67.1741	59.8895	21	86.6124	70.1593	59.0958	15
	SON	151.897	114.039	115.132	14	79.7379	63.4654	51.7888	28	131.6	97.1858	99.4488	10	62.0763	62.0763	3.01578	2
Li+	annual	0.0530005	0.0375298	0.07022	48	0.0319208	0.0254135	0.0331084	52	0.0120956	0.0045094	0.0226645	19	0.015279	0.0133328	0.011562	27
	DJFM	0.0201376	0.0102205	0.0219479	10	0.0259265	0.0259265	0.00489891	2	0.00629661	0.00369742	0.00720039	4	0.0143267	0.0133742	0.00672043	9
	A	0.0265156	0.0265156	0.016912	2	0.0188665	0.0188665	0.00201764	2	0.00388563	0.0033763	0.00239031	4	0.0147278	0.0116082	0.0109296	4
	MJJA	0.0420215	0.0395994	0.0217399	22	0.0233203	0.0172051	0.0156687	26	0.00553073	0.00407229	0.00613814	8	0.0179798	0.0127586	0.0148471	12
	SON	0.0975103	0.0663667	0.115896	14	0.0438168	0.0375176	0.0459242	22	0.0482805	0.0274543	0.0454582	3	0.00446255	0.00446255	0.000577583	2
Na+	annual	25.2299	21.9108	20.8155	54	25.2229	20.1387	15.3776	71	29.9287	22.694	26.8079	41	12.0452	9.17367	10.2808	31
	DJFM	15.8038	17.7182	9.80757	15	16.4958	13.3877	10.6807	7	21.2698	23.3297	12.9837	6	8.18069	8.9488	6.23426	11
	A	22.7189	26.1841	12.2192	4	18.3675	16.7329	9.53856	4	11.8258	10.9429	5.5459	5	11.746	12.7987	6.53076	4
	MJJA	20.9585	16.177	16.2535	21	26.3464	24.9361	15.4359	33	23.6974	21.3761	12.0366	20	16.0784	11.0018	12.9381	14
	SON	42.4536	41.1597	27.7234	14	27.128	21.3594	16.537	27	56.6379	47.4526	40.8644	10	5.66525	5.66525	2.07678	2
NH4+	annual	158.056	144.812	106.039	58	305.314	295.307	191.566	78	316.397	306.148	196.101	49	280.74	248.077	160.511	32
	DJFM	89.138	80.7762	77.1107	16	139.315	56.7501	184.985	10	174.256	109.155	146.364	13	201.905	229.201	118.464	11
	A	157.021	111.959	82.5889	5	349.333	351.338	247.096	6	240.818	251.268	101.022	5	405.628	360.568	233.25	4
	MJJA	133.617	127.11	65.5502	23	353.41	314.545	194.223	34	319.013	388.108	157.466	21	317.788	299.613	152.572	15
	SON	277.337	285.591	104.142	14	296.765	288.302	149.037	28	533.476	552.364	179.343	10	186.704	186.704	14.1045	2
K+	annual	24.2334	17.7048	22.8252	54	26.4457	23.268	17.8159	77	34.1249	15.48	34.047	47	25.6993	19.9224	26.2903	31
	DJFM	8.61182	8.65816	4.81452	13	8.13596	6.38594	5.7022	9	8.22434	7.90779	6.88498	11	8.04454	6.10464	6.46317	10
	A	10.6075	8.55655	6.97144	5	11.7973	10.8982	9.03867	6	6.31768	4.98763	4.35351	5	17.9254	15.8885	9.51119	4
	MJJA	23.7758	20.4396	16.8631	22	33.4252	29.9998	19.434	34	45.0194	41.1495	39.6217	21	39.8944	28.1822	31.261	15
	SON	44.3247	34.7226	29.6278	14	26.9947	23.6792	13.6374	28	53.6406	55.1612	20.6264	10	23.0577	23.0577	3.37657	2
Mg2+	annual	7.28366	6.82965	4.51074	56	8.62045	7.8735	5.50639	75	6.86182	5.03649	6.65811	49	6.66187	5.76393	4.89459	32
	DJFM	4.70935	3.52363	3.45426	15	3.74957	4.51823	3.07781	9	3.161	1.48039	3.00756	13	4.49043	5.2031	2.37683	11
	A	5.62307	3.24555	5.13349	5	5.00903	3.30724	4.18418	6	4.9639	4.20215	4.081	5	6.11687	5.50768	3.46676	4
	MJJA	6.58218	5.90566	2.46656	22	10.5776	8.50408	6.11759	33	6.00881	4.92476	3.37179	21	8.88105	6.75106	5.95802	15
	SON	11.7373	12.5144	4.93925	14	8.65451	8.62113	4.22704	27	14.4132	9.47927	10.2402	10	3.05095	3.05095	0.380784	2
Ca2+	annual	72.3599	66.4148	42.9894	55	90.834	74.4844	78.3895	79	57.4489	51.322	42.9545	48	51.4361	36.1745	42.0002	32
	DJFM	39.041	31.0703	30.0727	14	28.4554	20.5715	22.4648	11	23.8491	13.1096	21.2104	12	22.6873	17.3073	16.0134	11
	A	41.0637	35.1164	28.4138	5	67.1812	57.9875	51.0027	6	31.0482	37.371	21.8577	5	40.0018	41.4506	18.1213	4
	MJJA	84.5802	80.186	32.8948	22	128.184	110.913	97.279	34	63.3652	58.7767	30.4909	21	78.4593	78.092	45.8943	15
	SON	97.6528	93.8956	47.5605	14	75.0551	72.9912	42.341	28	98.5451	82.037	54.3743	10	29.7496	29.7496	11.7578	2
F-	annual	2.0457	1.48481	2.30872	49	2.79713	1.78779	2.4863	76	1.48575	1.12625	1.17187	42				14
	DJFM	0.923488	0.872776	0.411781	10	0.911087	0.602505	0.559094	9	0.570428	0.469713	0.414687	10		Fluoride		5
	A	0.930767	0.799721	0.471398	5	1.8841	1.18162	2.23716	6	0.545681	0.446049	0.184934	3		lost for		0
	MJJA	1.58163	1.28251	1.06425	20	3.63997	2.87559	2.82077	33	1.91542	1.7167	1.15299	20		PM10C		9
	SON	3.90844	2.78066	3.51066	14	2.60567	1.77018	2.10819	28	1.86132	1.70011	1.2961	9				0
Cl-	annual	8.72339	6.16548	7.08227	47	13.2807	9.78526	11.0139	45	10.8464	7.72533	11.9074	34				25
	DJFM	3.97467	3.2224	2.60409	11	4.53676	4.53676	0	1	1.57295	1.57295	1.27483	2		Chloride		7
	A	5.57589	5.43025	1.769	4	17.5083	17.5083	0	1	1.90896	2.51814	1.07192	3		lost for		3
	MJJA	9.08035	6.82429	7.80008	22	14.7002	10.7043	12.5954	28	10.732	9.00834	8.31623	21		PM10C		14
	SON	14.4207	16.661	6.12239	10	10.9321	8.01805	7.65608	15	16.8167	8.71035	19.2531	8				1
Br-	annual	1.44728	1.27392	0.924423	50	1.17615	0.910814	0.794351	69	1.62674	1.08586	1.53628	38	0.956395	0.77649	0.803109	28
	DJFM	0.861558	0.517325	1.09456	9	1.74053	1.56043	1.5539	4	0.459731	0.416185	0.160843	5	0.607152	0.242728	0.615794	9
	A	0.683308	0.780569	0.347746	5	0.463023	0.391871	0.237593	5	0.522978	0.469651	0.451705	4	0.614569	0.636609	0.268946	4
	MJJA	1.3098	1.25851	0.536661	22	1.14678	0.818061	0.723056	32	1.6619	1.73156	1.23936	20	1.29595	0.83488	0.916746	14
	SON	2.31271	2.09152	0.825072	14	1.25645	1.10247	0.750454	28	2.68751	2.71693	2.10923	9	0.713128	0.713128	0	1
NO3-	annual	149.117	127.913	114.238	58	84.9009	65.5809	79.2274	76	109.892	71.0677	115.785	45				29
	DJFM	49.464	31.5503	49.6205	17	38.4969	28.4867	32.1653	9	29.5628	14.1771	33.603	11		Nitrate		8
	A	126.081	151.038	51.5217	5	84.6956	42.8041	130.905	6	29.424	18.2649	26.8713	4		lost for		4
	MJJA	190.834	188.621	84.6479	22	86.9206	67.0506	62.0113	33	161.268	113.18	136.92	21		PM10C		15
	SON	212.797	230.134	145.931	14	97.4801	79.0991	92.2591	28	123.96	91.6316	76.96	9				2
SO42-	annual	450.707	399.238	326.688	58	1121.34	1046.58	794.903	79	991.192	919.917	761.148	52	904.604	889.386	499.173	32
	DJFM	302.142	242.177	274.493	16	512.63	279.628	690.852	10	510.791	334.615	454.747	14	659.132	659.413	354.88	11
	A	413.019	241.552	277.206	5	1071.23	1028.29	854.723	6	873.917	924.598	502.468	5	1186.29	1088.53	602.1	4
	MJJA	334.692	303.316	166.926	23	1360.13	1346.65	891.894	35	906.611	930.671	609.115	23	1060.61	903.023	516.709	15
	SON	824.551	795.168	328.901	14	1050.98	922.553	558.994	28	1916.93	1994.87	792.449	10	521.306	521.306	21.6657	2
Methanesulfonate	annual	6.58078	6.66875	3.56203	54	7.85907	7.4515	4.41278	76	6.72863	6.21983	3.45239	48	4.52234	4.83011	2.48271	32
	DJFM	3.38492	3.14512	2.4663	12	3.60988	2.88953	2.66442	8	3.76412	3.25087	2.71171	12	3.78007	1.93376	3.52605	11
	A	9.50528	8.64243	3.49404	5	5.62766	6.65609	2.88319	6	8.09657	6.20028	4.78438	5	5.0113	5.55675	1.8165	4
	MJJA	7.39362	6.79284	3.21301	23	8.6024	7.78359	3.82056	34	7.46396	6.88498	2.98589	21	5.22331	5.20457	1.53302	15
	SON	6.94024	8.41479	3.36589	14	8.64868	7.57644	5.00715	28	8.05788	7.7645	2.69968	10	2.36955	2.36955	0.539894	2
Fornate	annual	12.2533	8.78296	10.6861	48	13.795	12.0175	6.99366	50	27.5716	9.8016	68.934	16				27
	DJFM	8.28671	6.05058	6.74267	13	9.16355	9.16355	-	1	8.6853	8.19288	4.5695	4		Formate		8
	A	5.11507	5.35775	1.45103	4	14.3438	14.3438	1.26835	2	2.68134	2.68134	0.587204	2		lost for		2
	MJJA	13.2806	12.4643	8.68487	18	13.9897	12.0175	6.74039	24	12.8271	9.8016	11.249	8		PM10C		15
	SON	16.9939	13.2086	15.3117	13	13.7456	11.1094	7.76669	23	149.213	149.213	190.608	2				2
Oxalate	annual	32.8469	22.6262	40.8234	57	44.0192	40.2942	30.514	76	38.0188	30.29	37.4277	45	53.156	43.634	31.6965	32
	DJFM	27.5983	26.0549	21.4309	17	27.3214	25.182	18.2283	11	18.5475	8.81148	20.3744	11	39.0195	42.2239	18.5205	11
	A	22.5459	22.6262	20.9175	5	48.0157	40.0859	33.587	6	9.29572	8.33777	9.35852	4	59.8325	44.4388	37.9879	4
	MJJA	15.1749	3.65433	20.4826	21	39.9265	40.0566	23.9016	31	36.4391	31.2036	29.1972	21	59.7466	43.6632	37.3842	15
	SON	69.4071	59.2309	61.7483	14	54.2539	46.2938	37.0765	28	78.2688	76.1527	47.526	9	68.1235	68.1235	18.5223	2
H (neq/m3)	annual	1.35433	0.651012	2.99444	59	5.96737	5.15921	6.0172	80	4.02137	2.62395	5.11576	52	1.92344	0.705615	2.50142	32
	DJFM	1.06081	0.12794	2.28469	17	2.91701	2.89336	3.4369	11	1.14416	0.864888	1.03118	14	2.08623	2.28373	2.33235	11
	A	0.688745	0.93155	0.905338	5	3.17242	2.41397	4.51825	6	3.60266	1.7985	4.8068	5	1.39493	1.0409	1.47804	4
	MJJA	-0.219172	0.0740359	1.51856	23	7.32888	6.08649	6.82242	35	4.00125	2.78437	3.65379	23	2.15597	0.689331	2.99405	15
	SON	4.53351	3.30363	3.72531	14	6.06275	4.87112	5.58844	28	8.30511	6.04231	8.39634	10	0.341103	0.341103	0.538527	2
Glucose	annual	3.29032	2.64008	2.09684	54	3.69361	3.04029	2.63974	48	2.91215	2.45839	1.74798	44	1.81447	1.58684	1.12284	23
	DJFM	3.70499	3.32144	2.86346	13	2.84073	2.80969	1.34735	4	3.2609	2.24418	2.09009	10	1.992	1.5872	1.53766	8
	A	2.35698	2.43649	0.61691	5	3.8982	3.8982	0.745854	2	1.44005	1.45553	0.399536	5	1.55907	1.51636	0.931503	3
	MJJA	2.5106	2.34533	0.903556	22	4.00049	3.09432	3.52098	21	2.44301	2.52674	1.09726	19	1.89499	1.95368	0.930332	10
	SON	4.46389	3.82307	2.42928	14	3.5297	2.69037	1.84421	21	4.19083	4.15351	2.03236	10	1.08486	1.08486	0.289195	2
Levoglucosan	annual	12.6275	5.29449	22.6648	56	14.2915	8.47491	18.8725	70	36.5912	26.4625	41.0876	32	10.9959	6.77058	10.6241	19
	DJFM	1.41893	1.10106	1.37777	15	2.8015	2.43896	2.8845	5	6.30623	5.81562	2.63243	4	2.76371	2.44571	1.94805	5
	A	2.62097	2.22288	1.13977	5	2.01048	1.89197	1.3415	4	4.12354	4.12354	-	1	-	-	-	0
	MJJA	18.3561	9.60358	30.6385	22	19.9272	9.08291	25.3892	33	48.5333	32.6989	50.4294	17	15.21	14.87	11.3501	12
	SON	19.2084	10.9084	19.2052	14	11.4557	10.0645	7.13094	28	31.6505	31.7515	21.6836	10	6.29148	6.29148	1.80383	2
Mannosan	annual	2.91799	0.989207	5.47019	17	2.0565	0.799483	3.66648	50	6.92571	4.07069	9.50826	25	1.37735	1.10066	1.32021	14
	DJFM	-	-	-	0	0.646347	0.646347	-	1	0.830272	0.77198	0.212333	3	0.167434	0.167434	0.0718629	2
	A	-	-	-	0	0.0728798	0.0728798	-	1	-	-	-	0	-	-	-	0
	MJJA	2.70906	0.807279	5.83047	14	2.82274	0.889289	4.24343	24	10.4832	7.67702	12.0757	13	1.64131	1.28967	1.36839	11
	SON	3.89298	2.6062	4.08528	3	1.43167	0.796137	3.05866	24	3.81894	4.00915	2.66842	9	0.893619	0.893619	-	1
Galactosan	annual	1.99007	0.76403	4.91688	23	1.38097	0.572643	2.25764	48	5.01151	2.34627	8.09269	26	1.09296	1.0423	0.940714	14
	DJFM	-	-	-	0	0.320028	0.320028	-	1	0.472648	0.472648	0.115513	2	0.0884228	0.0884228	0.0497181	2
	A	0.14032	0.14032	0.0559154	2	-	-	-	0	0.651288	0.651288	0	1	-	-	-	0
	MJJA	3.45745	0.908893	6.93428	11	2.15556	0.970335	3.0692	23	8.24899	4.80611	10.5431	13	1.27369	1.05605	0.955188	11
	SON	0.745902	0.660319	0.746301	10	0.682853	0.517047	0.497605	24	2.14659	2.18556	1.6612	10	1.11404	1.11404	-	1
Arabitol	annual	3.76133	2.62557	4.30757	58	1.66579	1.44517	0.875146	44	1.0414	0.964786	0.323584	31	0.55718	0.507484	0.377363	22
	DJFM	2.71895	2.15957	1.75581	17	0.674172	0.758213	0.45453	3	1.422	1.29994	0.530273	4	0.676811	0.5154	0.631168	6
	A	2.31532	1.88061	1.15736	5	1.46275	1.46275	0.213267	2	0.660005	0.660005	0.0181141	2	0.688666	0.688666	0.0969012	2
	MJJA	2.62365	1.64895	2.15186	22	1.79109	1.68343	0.895272	18	1.03326	0.964786	0.235721	17	0.504641	0.431421	0.257349	12
	SON	7.33127	5.51044	7.17848	14	1.71938	1.45522	0.879579	21	0.963771	0.958325	0.264192	8	0.382035	0.382035	0.213926	2
Mannitol	annual	1.37592	1.09122	1.09808	49	1.68659	1.36595	1.24261	43	1.84792	1.62655	1.04491	40	1.16931	0.923334	0.874646	13
	DJFM	1.41829	1.09425	1.35532	12	1.85881	2.32752	0.995982	3	2.56708	2.12753	1.49166	9	1.69389	1.79865	1.20728	5
	A	0.782348	0.801086	0.227165	5	2.54754	2.54754	1.00727	2	0.794983	0.723716	0.158065	3	0.871687	0.871687	0.0730406	2
	MJJA	1.10123	1.03735	0.462964	19	1.61283	1.42438	0.902173	20	1.5979	1.60514	0.670399	19	0.771262	0.502105	0.499479	5
	SON	1.96659	1.75868	1.46784	13	1.64417	1.15153	1.62111	18	2.00756	1.94978	0.951542	9	1.13188	1.13188	-	1

## Sheet: bulk concentrations STP
STP		PM10A				PM2,5				PM10B				PM10C
(1013 hPa, 0ºC)	December 2011 to July 2013				August 2013 to December 2015				April 2016 to August 2017				February 2019 to March 2020
(ng/m3)	mean	median	std	N	mean	median	std	N	mean	median	std	N	mean	median	std	N
OC	913.324	702.549	648.033	56	880.972	669.285	728.854	77	801.016	605.396	604.491	49	607.098	529.385	448.799	32
EC	92.7866	68.2171	90.7695	36	80.6577	69.6776	48.5736	74	77.698	56.5206	68.6643	49	65.7553	51.2978	48.5479	32
Li+	0.0530005	0.0375298	0.07022	48	0.0319208	0.0254135	0.0331084	52	0.0120956	0.0045094	0.0226645	19	0.015279	0.0133328	0.011562	27
Na+	25.2299	21.9108	20.8155	54	25.2229	20.1387	15.3776	71	29.9287	22.694	26.8079	41	12.0452	9.17367	10.2808	31
NH4+	158.056	144.812	106.039	58	305.314	295.307	191.566	78	316.397	306.148	196.101	49	280.74	248.077	160.511	32
K+	24.2334	17.7048	22.8252	54	26.4457	23.268	17.8159	77	34.1249	15.48	34.047	47	25.6993	19.9224	26.2903	31
Mg2+	7.28366	6.82965	4.51074	56	8.62045	7.8735	5.50639	75	6.86182	5.03649	6.65811	49	6.66187	5.76393	4.89459	32
Ca2+	72.3599	66.4148	42.9894	55	90.834	74.4844	78.3895	79	57.4489	51.322	42.9545	48	51.4361	36.1745	42.0002	32
F-	2.0457	1.48481	2.30872	49	2.79713	1.78779	2.4863	76	1.48575	1.12625	1.17187	42		lost		14
Cl-	8.72339	6.16548	7.08227	47	13.2807	9.78526	11.0139	45	10.8464	7.72533	11.9074	34		lost		25
Br-	1.44728	1.27392	0.924423	50	1.17615	0.910814	0.794351	69	1.62674	1.08586	1.53628	38	0.956395	0.77649	0.803109	28
NO3-	149.117	127.913	114.238	58	84.9009	65.5809	79.2274	76	109.892	71.0677	115.785	45		lost		29
SO42-	450.707	399.238	326.688	58	1121.34	1046.58	794.903	79	991.192	919.917	761.148	52	904.604	889.386	499.173	32
MeSO3-	6.58078	6.66875	3.56203	54	7.85907	7.4515	4.41278	76	6.72863	6.21983	3.45239	48	4.52234	4.83011	2.48271	32
HCO2-	12.2533	8.78296	10.6861	48	13.795	12.0175	6.99366	50	27.5716	9.8016	68.934	16		lost		27
C2O4-2	32.8469	22.6262	40.8234	57	44.0192	40.2942	30.514	76	38.0188	30.29	37.4277	45	53.156	43.634	31.6965	32
H+ (neq m3)	1.35433	0.651012	2.99444	59	5.96737	5.15921	6.0172	80	4.02137	2.62395	5.11576	52	1.92344	0.705615	2.50142	32
Glucose	3.29032	2.64008	2.09684	54	3.69361	3.04029	2.63974	48	2.91215	2.45839	1.74798	44	1.81447	1.58684	1.12284	23
Levoglucosan	12.6275	5.29449	22.6648	56	14.2915	8.47491	18.8725	70	36.5912	26.4625	41.0876	32	10.9959	6.77058	10.6241	19
Mannosan	2.91799	0.989207	5.47019	17	2.0565	0.799483	3.66648	50	6.92571	4.07069	9.50826	25	1.37735	1.10066	1.32021	14
Galactosan	1.99007	0.76403	4.91688	23	1.38097	0.572643	2.25764	48	5.01151	2.34627	8.09269	26	1.09296	1.0423	0.940714	14
Arabitol	3.76133	2.62557	4.30757	58	1.66579	1.44517	0.875146	44	1.0414	0.964786	0.323584	31	0.55718	0.507484	0.377363	22
Mannitol	1.37592	1.09122	1.09808	49	1.68659	1.36595	1.24261	43	1.84792	1.62655	1.04491	40	1.16931	0.923334	0.874646	13

## Sheet: Wilcoxon_rank_sum_test
Chacaltaya data - Comparison of median between different periods
p= p score of Wilcoxon rank sum test (significance level set to 0,05)
H = Null hypothesis: H=1, medians are different; H=0, medians are the same
		PM10A vs PM 2,5			PM10B vs PM 2,5			PM10C vs PM 2,5			PM10A vs PM10B			PM10B vs PM10C			PM10A vs PM10C
	Season	p	H	PM10A/ PM2,5	p	H	PM10B/ PM2,5	p	H	PM10C/ PM2,5	p	H	PM10A/ PM10B	p	H	PM10B/ PM10C	p	H	PM10A/ PM10C
OC	annual	0.7411	0	0	0.243611	0	0	0.00918775	1	0.689122	0.209218	0	0	0.171627	0	0	0.00671474	1	1.50441
	DJFM	0.718432	0	0	0.475722	0	0	0.245278	0	0	0.381442	0	0	0.562343	0	0	0.0292725	1	1.54093
	A	0.428571	0	0	0.177489	0	0	0.914286	0	0	0.00793651	1	1.91036	0.285714	0	0	0.555556	0	0
	MJJA	0.737615	0	0	0.631883	0	0	0.462941	0	0	0.429741	0	0	0.847331	0	0	0.258853	0	0
	SON	0.0564247	0	0	0.0162456	1	1.522	0.588909	0	0	0.464214	0	0	0.030303	1	2.14621	0.333333	0	0
EC	annual	0.728454	0	0	0.16699	0	0	0.0666504	0	0	0.548281	0	0	0.738911	0	0	0.420942	0	0
	DJFM	0.728454	0	0	0.404936	0	0	0.492022	0	0	0.531631	0	0	0.907753	0	0	0.877717	0	0
	A	0.857143	0	0	0.428571	0	0	0.914286	0	0	0.0952381	0	0	0.412698	0	0	0.8	0	0
	MJJA	0.19299	0	0	0.506853	0	0	0.545327	0	0	0.510068	0	0	0.948831	0	0	0.258636	0	0
	SON	0.0169398	1	1.90495	0.0708157	0	0	1	0	0	0.578031	0	0	0.363636	0	0	0.2	0	0
Li+	annual	0.0247209	1	1.66037	3.65206e-06	1	0.378925	0.000303245	1	0.478654	7.60902e-07	1	4.3818	0.0117044	1	0.791647	5.87039e-06	1	3.46884
	DJFM	0.272727	0	0	0.133333	0	0	0.0727273	0	0	0.0759241	0	0	0.148252	0	0	0.780186	0	0
	A	1	0	0	0.133333	0	0	0.533333	0	0	0.133333	0	0	0.114286	0	0	0.533333	0	0
	MJJA	0.000664622	1	1.80193	0.000326779	1	0.237164	0.181988	0	0	6.07777e-05	1	7.59782	0.0228475	1	0.307608	0.00182551	1	2.33715
	SON	0.0393437	1	2.22541	1	0	0	0.0247295	1	0.101846	0.591176	0	0	0.2	0	0	0.0166667	1	21.8508
Na+	annual	0.515425	0	0	0.599255	0	0	1.69066e-06	1	0.477548	0.341853	0	0	1.80746e-05	1	2.48471	0.000246726	1	2.09461
	DJFM	0.943803	0	0	0.628205	0	0	0.104198	0	0	0.370641	0	0	0.0476729	1	2.6	0.0292725	1	1.93184
	A	0.685714	0	0	0.412698	0	0	0.485714	0	0	0.190476	0	0	0.904762	0	0	0.2	0	0
	MJJA	0.0576211	0	0	0.679708	0	0	0.0108591	1	0.610271	0.225201	0	0	0.0342548	1	1.47386	0.2067	0	0
	SON	0.0268855	1	1.56494	0.00982166	1	2.0878	0.0225628	1	0.208834	0.464214	0	0	0.030303	1	9.99742	0.0333333	1	7.49369
NH4+	annual	1.49741e-06	1	0.517682	0.67558	0	0	0.680833	0	0	2.15014e-05	1	0.499549	0.381956	0	0	8.41815e-05	1	0.562996
	DJFM	0.731914	0	0	0.306172	0	0	0.113102	0	0	0.100076	0	0	0.486906	0	0	0.0110429	1	0.441484
	A	0.329004	0	0	0.792208	0	0	0.761905	0	0	0.309524	0	0	0.190476	0	0	0.0634921	0	0
	MJJA	5.22192e-07	1	0.378079	0.85566	0	0	0.688184	0	0	0.000296287	1	0.418846	0.748306	0	0	4.8756e-05	1	0.42046
	SON	0.968075	0	0	0.00122887	1	1.79764	0.382673	0	0	0.00173242	1	0.519869	0.030303	1	2.85734	0.2	0	0
K+	annual	0.11562	0	0	0.726168	0	0	0.226722	0	0	0.720762	0	0	0.713188	0	0	0.916381	0	0
	DJFM	0.738462	0	0	0.648503	0	0	1	0	0	0.643011	0	0	1	0	0	0.598091	0	0
	A	0.930736	0	0	0.428571	0	0	0.352381	0	0	0.309524	0	0	0.031746	1	0.352442	0.285714	0	0
	MJJA	0.0192668	1	0.711314	0.869276	0	0	0.870756	0	0	0.349575	0	0	0.797411	0	0	0.0804997	0	0
	SON	0.0258858	1	1.64197	0.0009724	1	1.98708	1	0	0	0.168816	0	0	0.121212	0	0	0.333333	0	0
Mg2+	annual	0.227315	0	0	0.00751629	1	0.795994	0.0334789	1	0.772798	0.158577	0	0	0.552421	0	0	0.397704	0	0
	DJFM	0.438239	0	0	1	0	0	0.648503	0	0	0.153284	0	0	0.182683	0	0	0.958608	0	0
	A	1	0	0	1	0	0	0.47619	0	0	1	0	0	0.555556	0	0	0.730159	0	0
	MJJA	0.0118392	1	0.622274	0.0025578	1	0.568068	0.266077	0	0	0.44407	0	0	0.0952077	0	0	0.258853	0	0
	SON	0.0493286	1	1.3562	0.329719	0	0	0.0642523	0	0	0.976644	0	0	0.030303	1	4.72416	0.0666667	0	0
Ca2+	annual	0.423378	0	0	0.00557096	1	0.632461	0.00277676	1	0.566265	0.0507518	0	0	0.440741	0	0	0.0189865	1	1.40679
	DJFM	0.285735	0	0	0.644373	0	0	0.742666	0	0	0.0848787	0	0	0.829448	0	0	0.118706	0	0
	A	0.536797	0	0	0.125541	0	0	0.352381	0	0	0.690476	0	0	0.730159	0	0	0.904762	0	0
	MJJA	0.124771	0	0	0.00198592	1	0.494331	0.0927219	0	0	0.0597035	0	0	0.304516	0	0	0.840641	0	0
	SON	0.095394	0	0	0.311985	0	0	0.104964	0	0	0.83762	0	0	0.0606061	0	0	0.1	0	0
F-	annual	0.0438785	1	0.731356	0.00139669	1	0.53117				0.215733	0	0
	DJFM	0.842105	0	0	0.112754	0	0		F- lost		0.0451546	1	1.61894		F- lost			F- lost
	A	0.662338	0	0	0.261905	0	0		PM10C		0	0	0		PM10C			PM10C
	MJJA	0	0	0	0	0	0				0	0	0
	SON	0	0	0	0	0	0				0	0	0
Cl-	annual	0.0148113	1	0.656846	0.103357	0	0				0.807211	0	0
	DJFM	0.666667	0	0	0.666667	0	0		Cl- lost for		0.153846	0	0		Cl- lost for			Cl- lost for
	A	0.4	0	0	0.5	0	0		PM10C		0.0571429	0	0		PM10C			PM10C
	MJJA	0.0909204	0	0	0.298128	0	0				0.519668	0	0
	SON	0.174142	0	0	0.771454	0	0				0.514786	0	0
Br-	annual	0.0924829	0	0	0.66509	0	0	0.108678	0	0	0.707758	0	0	0.192263	0	0	0.00853564	1	1.51327
	DJFM	0.503497	0	0	0.285714	0	0	0.148252	0	0	0.518482	0	0	0.606394	0	0	0.340107	0	0
	A	0.420635	0	0	0.904762	0	0	0.412698	0	0	0.412698	0	0	0.685714	0	0	1	0	0
	MJJA	0.119234	0	0	0.323414	0	0	0.511502	0	0	0.553964	0	0	0.587552	0	0	0.407968	0	0
	SON	0.000219529	1	1.84067	0.0322195	1	2.13897	0.370028	0	0	0.728991	0	0	0.6	0	0	0.133333	0	0
NO3-	annual	0.000627177	1	1.75637	0.575193	0	0				0.0377278	1	1.35694
	DJFM	1	0	0	0.17146	0	0		NO3- lost for		0.258911	0	0		NO3- lost for			NO3- lost for
	A	0.177489	0	0	0.914286	0	0		PM10C		0.031746	1	4.28497		PM10C			PM10C
	MJJA	1.43784e-05	1	2.1955	0.0412987	1	1.85534				0.106156	0	0
	SON	0.0135849	1	2.18298	0.196327	0	0				0.243861	0	0
SO42-	annual	2.19681e-08	1	0.401937	0.319763	0	0	0.284203	0	0	0.000145405	1	0.454712	0.944924	0	0	6.62633e-06	1	0.498237
	DJFM	0.616587	0	0	0.703499	0	0	0.169706	0	0	0.220074	0	0	0.218039	0	0	0.01458	1	0.458394
	A	0.329004	0	0	0.930736	0	0	0.761905	0	0	0.150794	0	0	0.412698	0	0	0.0634921	0	0
	MJJA	3.96612e-07	1	0.246073	0.0469331	1	0.666561	0.270961	0	0	0.00144489	1	0.369168	0.492163	0	0	1.13342e-05	1	0.315567
	SON	0.343537	0	0	0.00334898	1	1.82394	0.124022	0	0	0.00375044	1	0.430142	0.121212	0	0	0.15	0	0
Methanesulfonate	annual	0.175878	0	0	0.188235	0	0	5.81811e-05	1	0.575429	0.975932	0	0	0.00278546	1	1.48787	0.00807276	1	1.45517
	DJFM	0.847054	0	0	0.907869	0	0	0.777989	0	0	0.83986	0	0	0.926445	0	0	1	0	0
	A	0.0822511	0	0	0.662338	0	0	0.352381	0	0	0.690476	0	0	0.555556	0	0	0.0634921	0	0
	MJJA	0.402208	0	0	0.327677	0	0	0.000686382	1	0.607193	0.832519	0	0	0.00934742	1	1.42897	0.0121217	1	1.41551
	SON	0.446999	0	0	0.960342	0	0	0.0416544	1	0.273978	0.618689	0	0	0.030303	1	3.40059	0.1	0	0
Fornate	annual	0.0223245	1	0.888239	0.0690701	0	0				0.919727	0	0
	DJFM	0.571429	0	0	1	0	0		Formate		0.623529	0	0		Formate			Formate
	A	0.133333	0	0	0.333333	0	0		lost for		0.133333	0	0		lost for			lost for
	MJJA	0.731507	0	0	0.144868	0	0		PM10C		0.597654	0	0		PM10C			PM10C
	SON	0.921294	0	0	0.146384	0	0				0.228571	0	0
Oxalate	annual	0.00200516	1	0.746195	0.0906485	0	0	0.129217	0	0	0.414797	0	0	0.0121921	1	0.715231	0.000636293	1	0.617935
	DJFM	0.887774	0	0	0.167905	0	0	0.130968	0	0	0.221311	0	0	0.030239	1	0.475338	0.0738512	0	0
	A	0.177489	0	0	0.0380952	1	0.193597	0.609524	0	0	0.412698	0	0	0.0285714	1	0.155362	0.190476	0	0
	MJJA	0.000276249	1	0.380071	0.4226	0	0	0.159742	0	0	0.0235731	1	0.416446	0.0400151	1	0.609894	0.000469595	1	0.253988
	SON	0.513304	0	0	0.107249	0	0	0.33901	0	0	0.395092	0	0	0.727273	0	0	0.7	0	0
Glucose	annual	0.571044	0	0	0.0779714	0	0	6.35132e-05	1	0.491246	0.215263	0	0	0.00501434	1	1.60496	0.000115054	1	1.81338
	DJFM	0.784874	0	0	0.839161	0	0	0.367677	0	0	0.641838	0	0	0.121989	0	0	0.0647867	0	0
	A	0.0952381	0	0	0.0952381	0	0	0.2	0	0	0.0555556	0	0	1	0	0	0.25	0	0
	MJJA	0.238646	0	0	0.110053	0	0	0.0295349	1	0.47369	0.844545	0	0	0.207026	0	0	0.160729	0	0
	SON	0.17266	0	0	0.409925	0	0	0.0253038	1	0.307351	0.976644	0	0	0.030303	1	3.86303	0.0166667	1	4.11473
Levoglucosan	annual	0.07432	0	0	0.0010198	1	2.56034	0.69988	0	0	4.31636e-05	1	0.345097	0.00583833	1	3.32773	0.326771	0	0
	DJFM	0.541193	0	0	0.111111	0	0	0.690476	0	0	0.00206398	1	0.225004	0.0634921	0	0	0.13784	0	0
	A	0.730159	0	0	0.4	0	0	0	0	0	0	0	0	0	0	0	0	0	0
	MJJA	0	0	0	0	0	0	0	0	0	0	0	0	0	0	0	0	0	0
	SON	0	0	0	0	0	0	0	0	0	0	0	0	0	0	0	0	0	0
Mannosan	annual	0.745789	0	0	1.13956e-05	1	3.36771	0.631883	0	0	0.00410488	1	0.421327	0.000988911	1	5.02829	0.858233	0	0
	DJFM	.-	-	-	0	0	0	0	0	0	0	0	0	0	0	0	0	0	0
	A	-	-	-	-	-	-	-	-	-	-	-	-	-	-	-	-	-	-
	MJJA	0	0	0	0	0	0	0	0	0	0	0	0	0	0	0	0	0	0
	SON	0	0	0	0	0	0	0	0	0	0	0	0	0	0	0	0	0	0
Galactosan	annual	0.644974	0	0	0.000228199	1	3.62899	0.768278	0	0	0.0033366	1	0.3971	0.0120894	1	4.58525	0.541419	0	0
	DJFM	0	0	0	0	0	0	0	0	0	0	0	0	0	0	0	0	0	0
	A	0	0	0	0	0	0	0	0	0	0	0	0	0	0	0	0	0	0
	MJJA	0	0	0	0	0	0	0	0	0	0	0	0	0	0	0	0	0	0
	SON	0	0	0	0	0	0	0	0	0	0	0	0	0	0	0	0	0	0
Arabitol	annual	5.10834e-05	1	2.25799	9.19379e-05	1	0.625172	1.25116e-08	1	0.334485	7.20739e-10	1	3.61178	2.57261e-06	1	1.86906	1.60502e-10	1	6.75065
	DJFM	0.0110716	1	4.03302	0.228571	0	0	0.904762	0	0	0.0975395	0	0	0.0666667	0	0	0.00292421	1	4.01729
	A	0.380952	0	0	0.333333	0	0	0.333333	0	0	0.0952381	0	0	1	0	0	0.0952381	0	0
	MJJA	0.334487	0	0	0.0028178	1	0.576886	9.69628e-06	1	0.28175	0.00057929	1	2.53921	0.000106815	1	2.04751	1.19468e-05	1	5.19905
	SON	1.51277e-05	1	4.26391	0.00502054	1	0.560535	0.0253038	1	0.222194	0.000151861	1	7.60686	0.0444444	1	2.52273	0.0166667	1	19.1901
Mannitol	annual	0.0769636	0	0	0.203608	0	0	0.0624588	0	0	0.00271671	1	0.744578	0.00892103	1	1.58035	0.324302	0	0
	DJFM	0.536264	0	0	0.727273	0	0	0.785714	0	0	0.01164	1	0.55249	0.23976	0	0	0.505818	0	0
	A	0.0952381	0	0	0.2	0	0	0.333333	0	0	0.785714	0	0	0.8	0	0	0.571429	0	0
	MJJA	0.0578826	0	0	0.642927	0	0	0.0323545	1	0.478203	0.0210891	1	0.689173	0.0128512	1	2.0718	0.20073	0	0
	SON	0.167247	0	0	0.0678619	0	0	0.947368	0	0	0.504274	0	0	0.4	0	0	0.571429	0	0
